# Supplementary material for: Ligand mediated tuning of the electronic energy levels of ZnO nanoparticles
Source: Royal Society of Chemistry journal article supplement (doi:10.1039/c2ra22429a), 2012-11-06
Supplement: c2ra22429a.pdf [file c2ra22429a.pdf]

# Ligand mediated tuning of the electronic energy levels of ZnO nanoparticles

Supriya Saha,<sup>†</sup> Sunandan Sarkar,<sup>†</sup> Sougata Pal,<sup>‡</sup> and Pranab Sarkar,<sup>†</sup>

*Department of Chemistry, Visva-Bharati University, Santiniketan- 731235, India, and  
Department of Chemistry, University of Gourbanga, Malda*

E-mail: pranab.sarkar@visva-bharati.ac.in

To whom correspondence should be addressed

<sup>†</sup>Visva-Bharati University

<sup>‡</sup>University of Gourbanga

### Supplementary Information

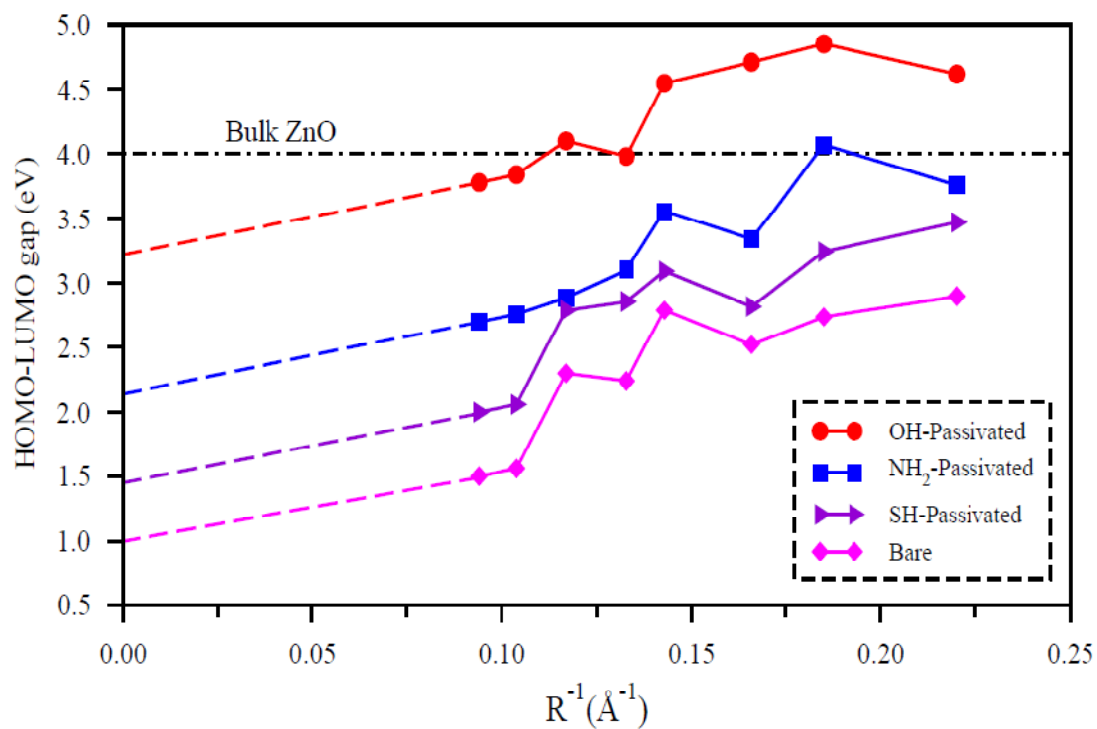

Fig. S1: Variation in HOMO-LUMO energy gap as a function of the inverse of the radius of ZnO QDs.
